# Supplementary material for: Silencing of miRNA-148a by hypermethylation activates the integrin-mediated signaling pathway in nasopharyngeal carcinoma
Source: PubMed Central journal article supplement (PMC4202148; doi:10.18632/oncotarget.2282), 2014-07-31
Supplement: oncotarget-05-7610-s002.pdf [file oncotarget-05-7610-s002.pdf]

# Silencing of miRNA-148a by hypermethylation activates the integrin-mediated signaling pathway in nasopharyngeal carcinoma

## Supplementary Material

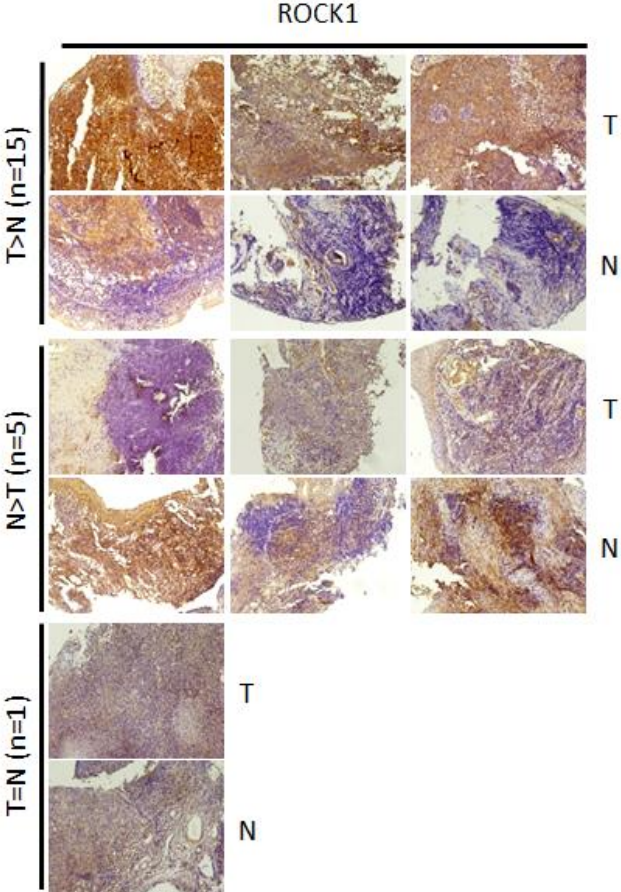

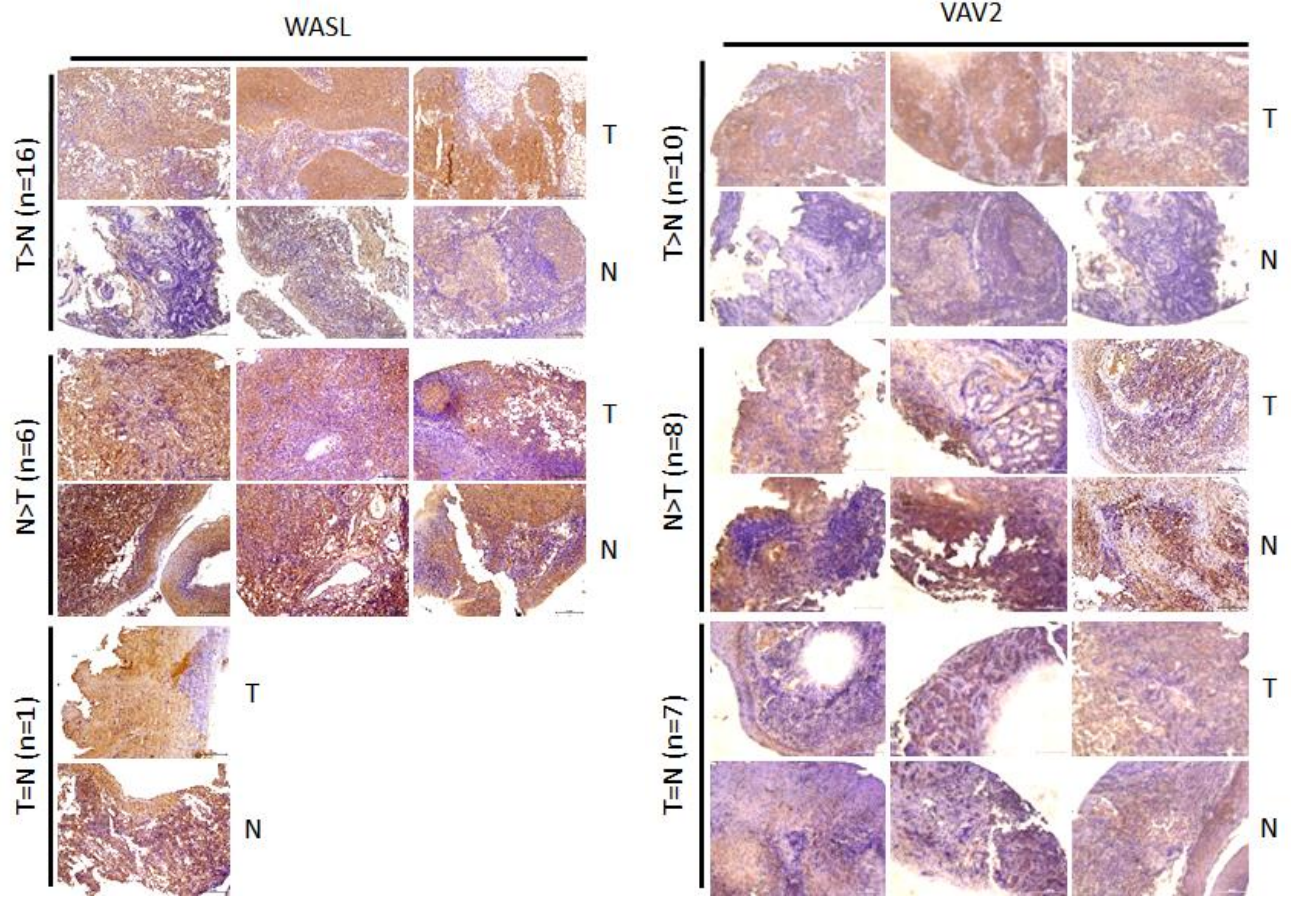

**Supplementary Figure 1:** Endogenous expression of miR-148a targets in 21 paired NPC tissues.
